# Supplementary material for: Simultaneous extraction of total polyphenols and triterpenes from leaves ofCeltis sinensisby deep eutectic solvent hybrid system combined with response surface methodology
Source: Royal Society of Chemistry journal article supplement (doi:10.1039/d2nj04936h), 2022-01-01
Supplement: d2nj04936h1.pdf [file d2nj04936h1.pdf]

## Supplementary Material

Simultaneous extraction of total polyphenols and triterpenes from leaves of *Celtis sinensis* by deep eutectic solvent multiple system combined with response surface methodology

Lei Wang<sup>a,b,1</sup>, Shiping Cao<sup>b,1</sup>, Guoqing Guo<sup>a,b</sup>, Yang Hu<sup>b</sup>, Jie Li<sup>b</sup>, Xianying Fang<sup>a,b,\*</sup>, Linguo Zhao<sup>b,c,\*</sup>

<sup>a</sup> *Jiangsu Co-Innovation Center of Efficient Processing and Utilization of Forest Resources, Nanjing Forestry University, Nanjing 210037, China;*

<sup>b</sup> *College of Chemical Engineering, Nanjing Forestry University, Nanjing 210037, China;*

<sup>c</sup> *Co-Innovation Center for Sustainable Forestry in Southern China, Nanjing Forestry University, Nanjing 210037, China.*

<sup>1</sup> *These authors contributed equally to this work*

**\*Correspondence author:** Xianying Fang and Linguo Zhao

*E-mail address:* [xianyingfang@njfu.edu.cn](mailto:xianyingfang@njfu.edu.cn); [lgzhao@njfu.edu.cn](mailto:lgzhao@njfu.edu.cn)

Tel.: +86-25-85427396

*E-mail address:* [njfu2304@163.com](mailto:njfu2304@163.com)

Figure S1. Schematic representation of *Celtis sinensis* leaves.

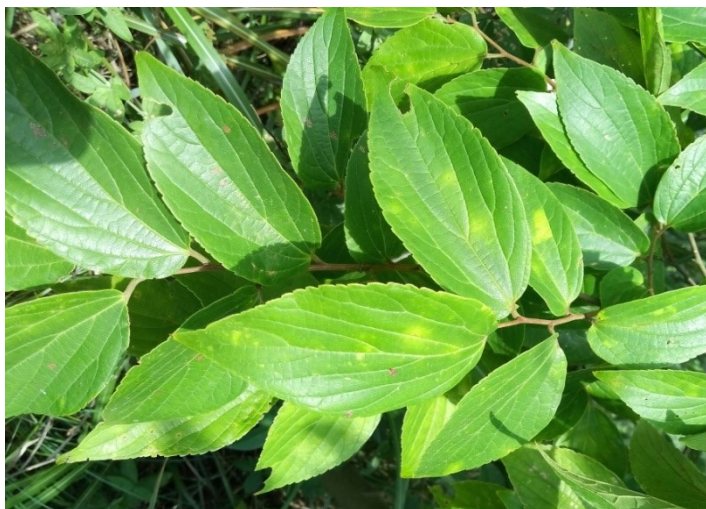

Figure S2. The structure of main compounds about polyphenols and triterpenes in *Celtis* leaves. (A) 2, 4-Dihydroxybenzaldehyde, (B) 2, 4-Dihydroxybenzoic acid, (C)  $\beta$ -Sitosterol, (D) 3-Hydroxy-12-ursen-28-oic acid

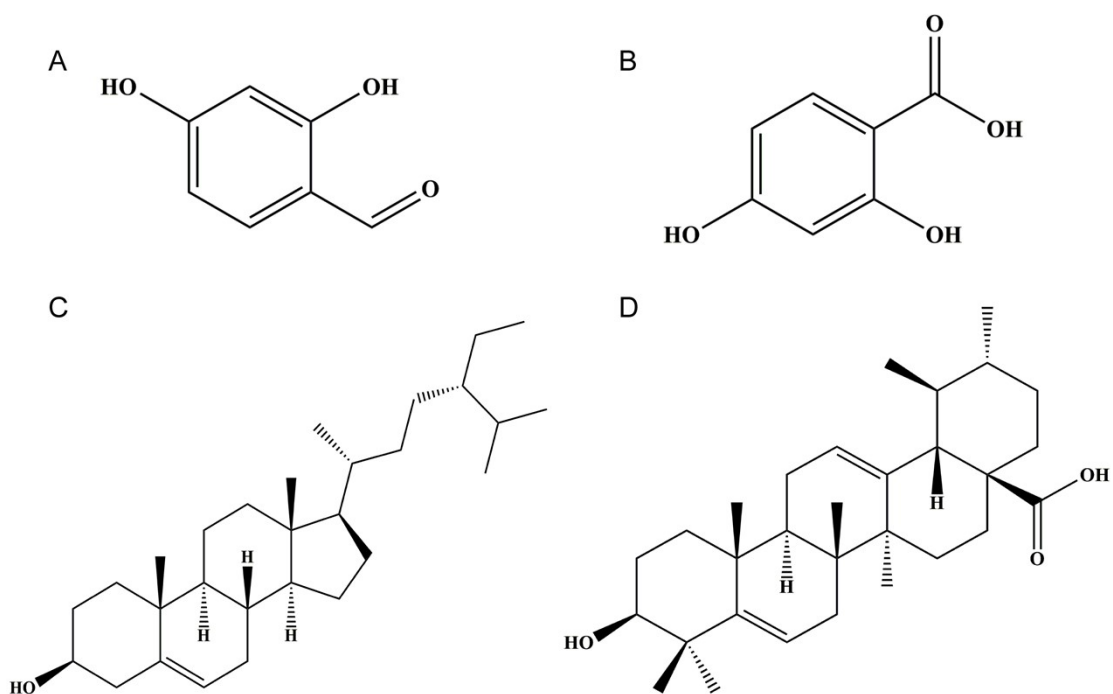

Figure S3. Gallic acid was used as the standard substance to establish curve to measure total polyphenol. (X is the concentration (mg/mL) of gallic acid, Y is absorbance of

gallic acid)

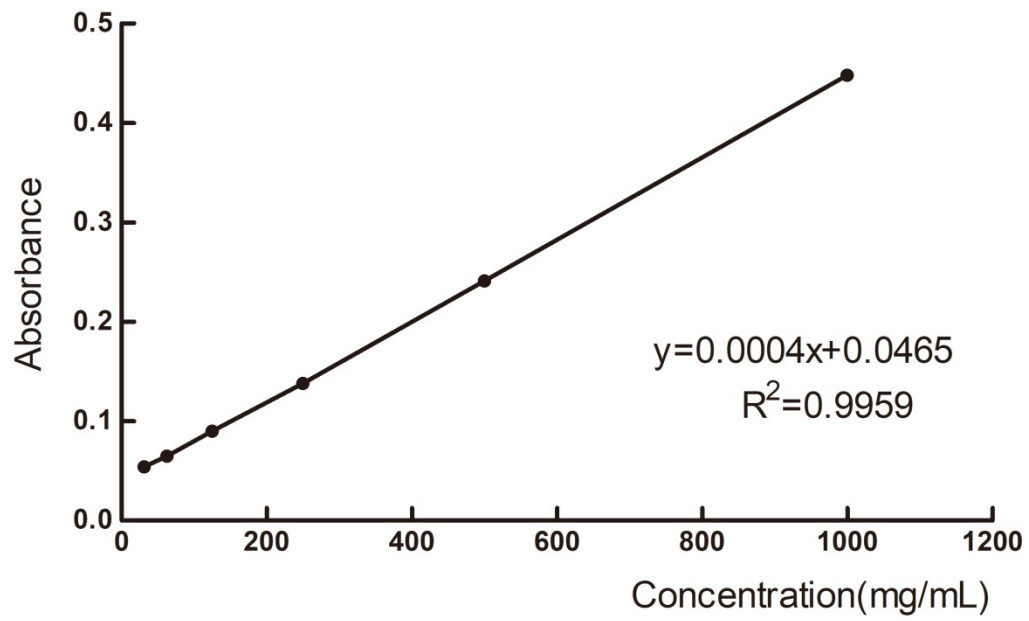

Figure S4. Oleanolic acid was used as the standard substance to establish curve to measure total triterpene. (X is the concentration (mg/mL) of oleanolic acid, Y is absorbance of oleanolic acid)

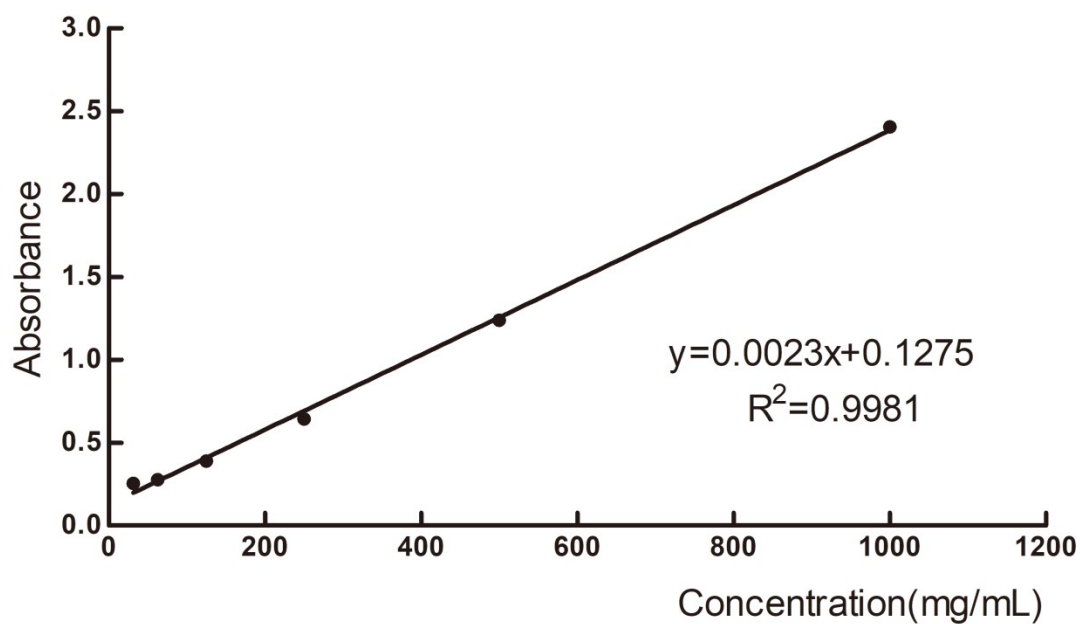

Table S1. ANOVA of the second-order polynomial equation for *Celtis* polyphenols

| Source         | Sum of Squares | df | Mean Square | F-Value | p-Value  | Remarks         |
|----------------|----------------|----|-------------|---------|----------|-----------------|
| Model          | 1490.42        | 9  | 165.60      | 19.04   | < 0.0001 | significant     |
| A              | 7.89           | 1  | 7.89        | 0.91    | 0.3634   |                 |
| B              | 3.77           | 1  | 3.77        | 0.43    | 0.5251   |                 |
| C              | 529.71         | 1  | 529.71      | 60.89   | < 0.0001 |                 |
| AB             | 22.07          | 1  | 22.07       | 2.54    | 0.1423   |                 |
| AC             | 24.85          | 1  | 24.85       | 2.86    | 0.1218   |                 |
| BC             | 71.99          | 1  | 71.99       | 8.28    | 0.0165   |                 |
| A <sup>2</sup> | 21.32          | 1  | 21.32       | 2.45    | 0.1486   |                 |
| B <sup>2</sup> | 3.47           | 1  | 3.47        | 0.40    | 0.5418   |                 |
| C <sup>2</sup> | 9.64           | 1  | 9.64        | 1.11    | 0.3172   |                 |
| Residual       | 86.99          | 10 | 8.70        |         |          |                 |
| Lack of Fit    | 15.88          | 5  | 3.18        | 0.22    | 0.9372   | not significant |
| Pure Error     | 71.10          | 5  | 14.22       |         |          |                 |
| R <sup>2</sup> | 0.9449         |    |             |         |          |                 |

Table S2. ANOVA of the second-order polynomial equation for *Celtis* triterpenes

| Source           | Sum of Squares | df | Mean Square | F-Value | p-Value | Remarks         |
|------------------|----------------|----|-------------|---------|---------|-----------------|
| Model            | 233.89         | 12 | 19.49       | 7.49    | 0.0065  | significant     |
| A                | 2.46           | 1  | 2.46        | 0.94    | 0.8427  |                 |
| B                | 8.17           | 1  | 8.17        | 3.14    | 0.0042  |                 |
| C                | 13.41          | 1  | 13.41       | 5.15    | 0.0028  |                 |
| AB               | 4.97           | 1  | 4.97        | 1.91    | 0.2066  |                 |
| AC               | 5.62           | 1  | 5.62        | 2.16    | 0.1813  |                 |
| BC               | 37.47          | 1  | 37.47       | 14.40   | 0.0040  |                 |
| A <sup>2</sup>   | 0.37           | 1  | 0.37        | 0.14    | 0.7192  |                 |
| B <sup>2</sup>   | 5.82           | 1  | 5.82        | 2.14    | 0.1743  |                 |
| C <sup>2</sup>   | 1.08           | 1  | 1.08        | 0.40    | 0.5433  |                 |
| A <sup>2</sup> B | 2.04           | 1  | 2.04        | 0.78    | 0.4054  |                 |
| A <sup>2</sup> C | 4.62           | 1  | 4.62        | 1.78    | 0.2243  |                 |
| AB <sup>2</sup>  | 2.35           | 1  | 2.35        | 0.90    | 0.3738  |                 |
| Residual         | 18.21          | 7  | 2.72        |         |         | not significant |
| Lack of Fit      | 10.21          | 2  | 5.11        | 3.19    | 0.1278  |                 |
| Pure Error       | 8.00           | 5  | 1.60        |         |         |                 |
| R <sup>2</sup>   | 0.9278         |    |             |         |         |                 |
